1  
2  
3  
4  
5  
6  
7  
8  
9  
10  
11  
12  
13  
14  
15  
16  
17  
18  
19  
20  
21  
22  
23

Application of the Social Cognitive Theory amid food parenting practices of Black immigrant mothers in the US: A qualitative study

Phoebe Tchoua<sup>1\*</sup>,<sup>#a</sup>, Mary Brannock<sup>1</sup>, Deborah Slawson<sup>1</sup>,

<sup>1</sup> Department of Community and Behavioral Health, College of Public Health, East Tennessee State University, Johnson City, Tennessee, United States of America

<sup>#a</sup>Current Address: Department of Health Behavior, Gillings School of Global Health, The University of North Carolina at Chapel Hill, Chapel Hill, North Carolina, United States of America

\*Corresponding author  
E-mail: [ptc@unc.edu](mailto:ptc@unc.edu) (PT)

24 **Abstract**

25 **Background:** Children of Black immigrant parents living in the US are at elevated risk of being  
26 overweight or obese, thus increasing their risks of morbidity and mortality as they age. Parents  
27 play a crucial role in shaping their children's nutrition through their food parenting practices. The  
28 Social Cognitive Theory (SCT) can explain Black immigrant mother's FPP and their children's  
29 dietary behavior. This study aimed to assess SCT's constructs, personal (maternal knowledge,  
30 attitudes, beliefs) and environmental factors (acculturation) in relation to the behavioral factor  
31 (food parenting practices) among a sample of Black immigrant mothers living in Metro Atlanta,  
32 Georgia. **Methods:** Convenience sampling was employed to recruit 30 Black immigrant mothers  
33 who lived in seven Metro Atlanta, Georgia counties in the summer of 2022. Four focus group  
34 interviews were conducted over two weeks. The qualitative data analysis was thematic. **Results:**  
35 Focus group data analysis revealed seven major themes: knowledge, attitude, belief, modeling,  
36 acculturation, coercive control, and structure, and six subthemes. Mothers discussed being  
37 intentional about encouraging healthy foods and limiting unhealthy foods for their children.  
38 Overall, acculturation influenced mothers' food parenting practices. Since migrating to the US,  
39 some mothers' nutrition changed in positive (e.g., eating more fruits) and negative ways (e.g.,  
40 snacking more) because of schedules, cost, and access. Children ate a mixed diet, the mother's  
41 native diet and the American diet, and the former was considered healthier and affordable by  
42 most. **Conclusion:** This is the first study to look at the food parenting practices of Black  
43 immigrants in the US. By identifying key factors that influence the food parenting practices of  
44 this population and their children's dietary habits, this study's findings are useful to practitioners  
45 or researchers who work with this population on nutrition and obesity prevention.  
46 **Keywords:** food parenting practices, Black immigrant, Obesity, focus groups, child nutrition

## 47 Introduction

48 According to the 2019-2020 National Survey of Children's Health 10- to 17-year-olds  
49 with a foreign-born parent had higher BMIs when compared to children whose parents were born  
50 in the US [1]. Since children of immigrant parents have an increased risk for being overweight  
51 [2], it is important to learn about factors that can contribute to this risk, such as food parenting  
52 practices [3]. Research has shown that differences exist between food parenting practices of  
53 White and racial/ethnic minority groups [4, 5].

54 Poor nutrition is a major risk factor for chronic diseases [6–10]. On average, the diet  
55 quality of children in the US is poor with a Healthy Eating Index score of 58 out of 100, among  
56 individuals 2 and older [11]. Studies have also shown that food parenting practices can directly  
57 influence the child's eating habits [12] and the risk of a child being overweight or obese [13]. For  
58 this study, food parenting practices are defined as parents' behaviors or actions, as primary  
59 caregivers, that affect their child's dietary behavior. Parents play a vital role in developing many  
60 aspects of their children's lives, including nutrition. Children depend on their parents for the  
61 quantity and quality of food that is available in the home (such as meals and snacks), and parents  
62 can create (knowingly or unknowingly) an obesogenic environment in the home [14].

63 The Social Cognitive Theory (SCT), as a whole or in a modified form, has been used by  
64 many researchers to explain human health behavior [15]. It is defined as a model of reciprocal  
65 causation between personal factors, behavior, and the environment (see Fig 1) [16]. When  
66 considering the food parenting practices of Black immigrant mothers, the SCT model can be  
67 adapted where (1) the personal factors represent the maternal knowledge, attitudes, and beliefs,  
68 (2) the behavioral factors are the food parenting practices, and (3) the environment is

69 acculturation, the physical and psychological changes from moving from your native culture into  
70 a new culture. See Fig 2.

71

72 **Fig 1. Social Cognitive Theory Model.**

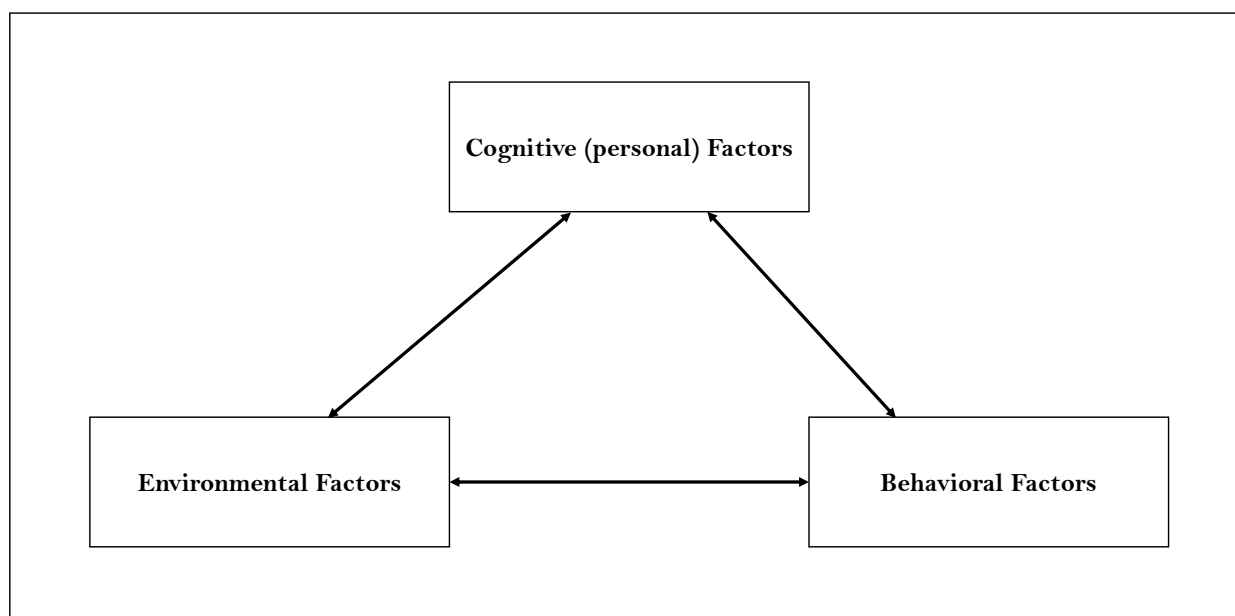

73

74

75 **Fig 2. Modified Social Cognitive Theory Model.**

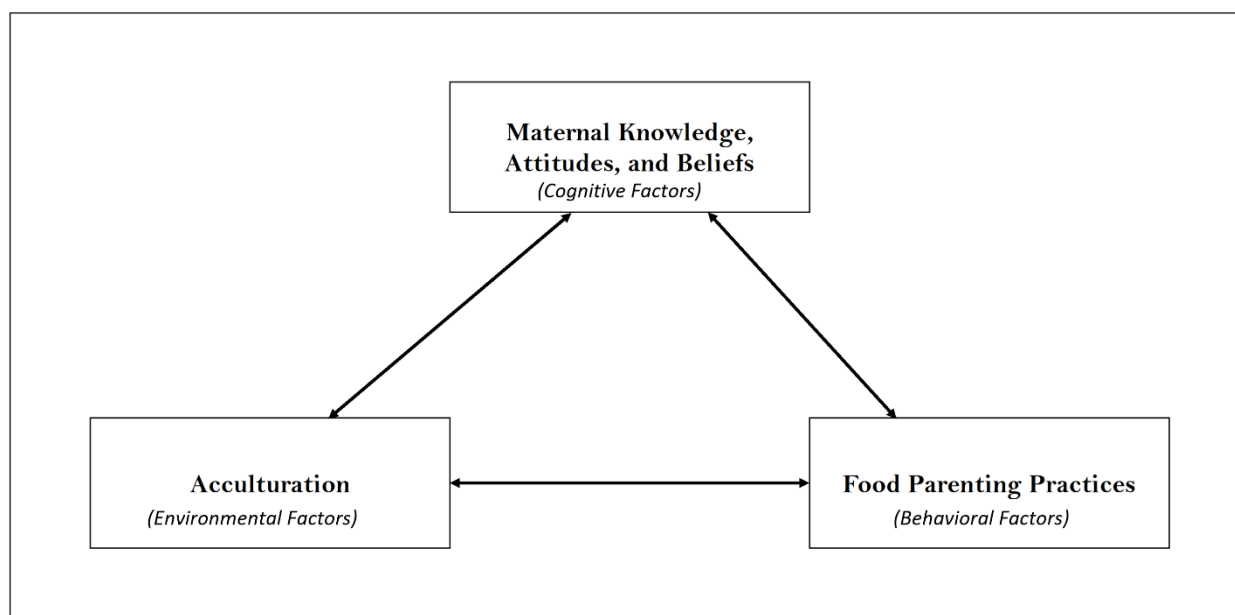

76

77

78 Parents' knowledge, attitudes, beliefs, and acculturation towards nutrition influence their  
79 food parenting practices and their children's dietary behavior and nutrition. Higher levels of  
80 acculturation among family members have been found to be related to an increased incidence of  
81 excess body weight in family members, including children and youth [17, 18].

82 Few studies in the US have explored the food parenting practices of Black immigrant  
83 mothers. No study, to the authors' knowledge, has looked exclusively at the relationship between  
84 food parenting practices of Black immigrant mothers and its influence on their children's  
85 nutritional behavior while informed by a theoretical model. Kengneson [19] conducted the first  
86 study to identify factors associated with the feeding practices of Black immigrant mothers living  
87 in Ottawa, Canada. They concluded by highlighting the need for more qualitative studies to  
88 better understand the influence of the feeding practices that Black immigrant mothers on their  
89 children's dietary behavior, and weight status.

90 In this study, we aimed to assess the SCT's constructs among a sample of Black  
91 immigrant mothers living in Metro Atlanta, Georgia. Specifically, we wanted to assess maternal  
92 knowledge, attitudes, beliefs, acculturation, and modeling in relation to food parenting practices  
93 among a sample of participants who previously completed a modified Comprehensive Home  
94 Environment survey using focus groups.

## 95 **Methods**

### 96 **2.1. Participants**

97 Four focus groups consisting of 6-12 participants from Metro Atlanta, Georgia were held  
98 on *Zoom* (version 5.3.0) due to COVID-19 (N=30) during August 2022. Initially, focus groups  
99 were scheduled based on children's age (e.g., 2-4 years old, 5-9 years old, 10-14 years old, and

100 15-19 years old). However, due to scheduling conflicts and low sign-ups for each group, only  
101 one focus group was based on age. All participants provided. The first focus group included mothers  
102 of children aged 2-4 years old. The remaining focus groups included mothers of children aged 2-  
103 11 years old. Thirty mothers from seven African and Caribbean countries participated in the four  
104 focus group discussions. The length of stay in the US for participants ranged from 5 to 25 years.

## 105 **2.2. Recruitment, participant selection**

106 Participants were recruited by PT (the first author) via flyers (Facebook, Reddit,  
107 Instagram, and WhatsApp), and emails to relevant community organizations, and snowball  
108 sampling from 15, July 2022 – 23, August 2022. After visiting the study link, found on study  
109 flyers, study participants took an 8-question screening survey to determine eligibility, read the  
110 consent form, and gave their digital consent to participate in a focus group. Study inclusion  
111 criteria were females over 18 years of age, born in an African, Caribbean, or Latin American  
112 country, fluent in English, of Black, African, or Afro-Caribbean race or ethnicity, who resided in  
113 one of 11 metro Atlanta counties, with a child between the age of 2 and 19, and the primary  
114 caregiver of the child. Parents were excluded if they did not meet all eight inclusion criteria.  
115 Study participants received a \$10 Tango gift card as an incentive.

116 The study protocol was reviewed and approved by the East Tennessee State University  
117 (ETSU) Institutional Review Board. Digital consent, by clicking “I agree: (a) I have read the  
118 consent form, (b) I agree to volunteer, and (c) I am physically present in the United States”, was  
119 gained from each participant prior to study involvement.

## 120 **2.3. Measures**

121 All four focus groups were moderated by PT, *MPH*, a female doctoral student, who was  
122 assisted by two research assistants (*SZ* and *SM*) trained in qualitative research methods. PT, *SZ*,

123 and SM obtained their qualitative skills through the ETSU Doctor and Master of Public Health  
124 programs in Community and Behavioral Health. SZ and SM observed and recorded participants'  
125 behaviors and input and shared their notes with PT immediately after each focus group  
126 discussion. Some participants knew the researcher as well as one another, and all were informed  
127 about the researcher's goal for the study. The research team (PT, SZ, and SM) facilitated the  
128 sessions using a semi-structured discussion guide that consisted of 15 questions (see Table 1),  
129 developed by PT and two qualitative research experts, to elicit data on the role of acculturation in  
130 the child's dietary behavior, the effects of the mother's eating behavior on her child, how the  
131 mother's knowledge and beliefs impact the child's eating behavior, the food parenting practices  
132 of the mother, and her learning needs about nutrition. During the data collection process, the  
133 guide was re-evaluated to ensure that rich and in-depth data were collected.

134

### **Table 1. Focus Group Interview guide.**

---

#### **To understand how the process of adopting the American culture as a Black immigrant can impact the child's dietary behavior:**

- Q1 Let's begin by having each of you describe an average day feeding your child(ren).  
Probe: breakfast, lunch, dinner, snacks
- Q2 So, since moving to the US, how has what you eat changed?  
Probe: types of food and beverages, the timing of meals, snacking  
Probe: What do you eat/drink more of? Less of?
- Q3 What about your children? How has what you feed them changed since moving to the US?  
(If your child was born in the US, what is the difference between what you feed them here vs. what you fed them in your native country?)
- Q4 What things would you say caused these changes?  
Probe: work schedule, food availability, childcare, proximity to parents/family members?  
Probe: In what ways?
- Q5 Among the things you shared, which ones have had the greatest influence on what and how you feed your child?  
Probe: Why did these factors have such a significant influence?

#### **To understand how the eating behavior of the mother affect that of children:**

- Q6 Do you use food to deal with boredom, anger, bad mood, to celebrate, or treat yourself?  
Probe: If yes, tell me more.  
Probe: If yes, what kinds of food?

Q7 If your child was asked to list the foods you normally eat, what foods would they list?

Q8 How do you think about the food you eat in front of your child?

Probe: Do you avoid buying certain foods for your home?

Q9 What differences are there (if any) between what you eat and what your child(ren) eats?

**To discover how knowledge and beliefs of the mother impact the child's eating behavior:**

Q10 What comes to mind when you hear 'US Department of Agriculture dietary recommendation guidelines'?

Q11 How do you think the food you feed your children is influenced by what you ate as a child?

**To learn about other food parenting practices:**

**Restriction**

Q12 How do you regulate your child(ren)'s consumption of junk food, such as cookies, chips, sodas, juices, or other processed foods?

Probe: Does your regulation help your child eat fewer processed foods?

**Pressure to eat**

Q13 Do you try to get your child(ren) to eat?

Probe: If yes, describe a typical or recent scenario where this happened.

**To learn about food in the school environment**

Q14 If your child is enrolled in school, do they eat at school or pack their lunch?

Probe: If they eat at school, what are your thoughts on the meals they eat there?

Probe: If they pack their lunch, who typically prepares the lunch and how are decisions made about what to pack?

Probe: Do you think your child(ren) eats better at school or at home?

i. Nutritional quality?

ii. Amount?

**The learn about the learning needs of participants:**

Q15 Before we end, I would like to know what information [and/or resources] about nutrition [including feeding children] you would like to learn more about.

Probe: In what format would you prefer to receive this information? Social media (Facebook, Instagram, TikTok, YouTube), a doctor, health department, or other?

Probe: Any comments in general about what we discussed today? Is there anything I missed?

---

135

## 136 2.4. Data collection and data analysis

137 The hypothesis was specified before the data were collected. The analytic plan was pre-  
138 specified, and any data-driven analyses were clearly identified and discussed appropriately. The  
139 data analysis was thematic [20]. Focus groups lasted 78 (focus group 1), 90 (focus group 2 and  
140 3), and 84 (focus group 4) minutes, were digitally recorded with participants' consent, and the  
141 semi-structured interviews continued until no new thematic ideas were generated. Focus group  
142 attendance was limited to the participants, the researcher, and research assistants.



143           The recorded focus group interviews were transcribed verbatim. A codebook was  
144 generated through an iterative process whereby themes were generated from the focus group  
145 data. Inter-rater reliability was assessed through a process where 25% of the data were double-  
146 coded by PT and MB (the second author, and a doctoral student experienced in qualitative data  
147 analysis), with resolution of discrepancies and resultant consensus building to reach 83% coding  
148 similarity. Differences in codes were discussed, and resolved, and the codebook was modified  
149 accordingly to help with consensus building and inter-rater reliability. The team (PT and MB)  
150 reached 83% coding similarity; and PT coded the remaining data (i.e., 75%) using the finalized  
151 codebook and generated a summary of each theme across the four focus groups. Key focus group  
152 findings were shared with participants via an informational graphic, following completion of the  
153 research project.

## 154 **Results**

155           During two weeks in August 2022, thirty mothers over the age of 18 participated in four  
156 focus group discussions. The number of participants in each focus group ranged from 6 to 12.  
157 The focus groups were held on Tuesday evenings and Saturday mornings or early afternoon.  
158 Seven countries were represented across all focus groups, with most participants emigrating from  
159 African countries. The length of stay in the US ranged from 5 to 25 years, and their children  
160 ranged in age from 2 to 11 years old. In total, seven major themes (*Knowledge, Attitude, Beliefs,*  
161 *Modeling, Acculturation, Coercive Control, and Structure*) and six subthemes (*Know, Want to*  
162 *Know, Adopting the US lifestyle (opportunities and challenges), Nutrition Change, Child's Diet:*  
163 *Common Foods, and Child's Diet: School Lunch food*) were identified in participants' focus  
164 group discussions. Each theme and subtheme are defined below and include quotes from study  
165 participants. The author of each quote is identified with an R for respondent and a number.

166 Where R1–R6 are from focus group 1, R7–R16 focus group 2, R17–R24 focus group 3, and  
167 R25–R30 focus group 4. All focus group participants are female, and their age is not included to  
168 maintain the anonymity of each mother.

### 169 **3.1. Theme 1 and Subthemes**

170 *Knowledge* consisted of two subthemes, *Know* and *Want to Know*.

#### 171 **3.1.1. Subtheme 1: Know**

172 This subtheme is defined as the mother’s education, information, and experience on  
173 nutrition, and the role of different groups and types of food on health. Across all four focus  
174 groups, mothers shared being intentional about limiting or encouraging certain foods. They  
175 wanted to limit sugar intake because the child is still developing, candy can cause tooth decay,  
176 junk food is not good for the body, and processed food is not as healthy as homecooked meals.  
177 As stated here,

178  
179 *“For me, I avoid [inaudible] and things like candy sweets they're not available in our*  
180 *house like you don't buy them just to stay there, to avoid the too much sugars and maybe*  
181 *the spoiling of teeth.” – R24*

182  
183 On the other hand, participants shared that eating body-building foods such as fruits and  
184 vegetables, plants, and animal products, was necessary for the child’s development. A balanced  
185 diet included all food groups, food gave you vitamins, and fruits helped relieve constipation. As  
186 shared by this mother,

187

188            *“I have um worked on him consuming more fruits than before. He used to be really*  
189            *constipated and I had to do something about it.” – R23*

190

### 191    **3.1.1. Subtheme 2: *Want to Know***

192            This subtheme is defined as additional information the mothers would like to receive on  
193            nutrition. In three of the focus groups, participants wanted to know which foods boost appetite,  
194            keep kids healthy, when to eat certain foods (e.g., time of day), recommended amounts of  
195            various macro- and micro-nutrients (e.g., protein, veggies, calcium), how to encourage the child  
196            to eat at various stages in childhood, correct serving sizes, and what is truly inside the food  
197            served at restaurants. For example, two mothers said,

198

199            *“In my case, I would like to know the foods that my kid should eat in order to stay healthy*  
200            *and grow more healthier and the times to eat...” – R5*

201

202            *“It is how to get rid of that snack yeah, it's costly.” – R4*

203

### 204    **3.2. Theme 2: *Attitude***

205            This theme is defined as, the mother’s accepted way of thinking about food in general  
206            and about certain foods, how she ate as a child and its influence on how she feeds her child, her  
207            feelings and emotions, her actions, and her tendency to move toward or away from certain foods.  
208            In three of the four focus groups, several mothers shared how their childhood dietary habits  
209            influenced what they do or do not feed their children. If she liked eating a certain food as a child,

210 she now prepared it for her child (e.g., cooking beans, traditional foods, making home-cooked  
211 meals). As stated here,

212  
213 *“Yeah, I think feeding is a continuous stuff like a generation stuff. So, seeing our parents*  
214 *fed us with vegetables we as parents now think is ok to continue with the feeding cycle.*  
215 *Like for me I was trained to eat an egg every day, so I also make my baby to do that each*  
216 *morning.” – R9*

217  
218 *“It is 90% influenced by the foods I ate as a child.” – R19*

219  
220 For one mother, she does not force her children to eat what she disliked eating growing  
221 up. As she said here,

222  
223 *“Growing up I hated beans and fufu. For that reason, I don’t force my kids to eat beans*  
224 *or fufu but my mom that lives with me tries to enforce it, particularly eating beans.” –*  
225 *R17*

226  
227 As for participants’ attitude toward sugar, fast food, and processed foods, mothers in all  
228 four focus groups are intentional about minimizing or eliminating their consumption. In some  
229 households, fast foods are limited to once or at most twice a week, sweets are an occasional treat,  
230 hotdogs are not served because of the nitrate, cereal is not served because of the sugar content,  
231 concerns that some processed foods are carcinogenic, dilute juice because of the high sugar  
232 content, and disinfect lunch meat before eating. For example, two mothers said,

233

234 *"They'll eat um Cheerios. It's the mixture of the honey versus the plain just so that it's not*  
235 *too sweet."* – R29

236

237 *"Well, I still try to eat a lot of things I ate back home all the ones I can get here ... but*  
238 *then you kind of like incorporate some of that you know American food here, pizza. I love*  
239 *pizza though, but I try not to eat it so much. I just try to limit it to maybe once in two*  
240 *weeks or something."* – R14

241

### 242 **3.3. Theme 3: Beliefs**

243 The theme of “Beliefs” encompasses what the mother has accepted as accurate  
244 concerning nutrition, food in the US, the USDA (United States Department of Agriculture)  
245 Dietary Guidelines and Recommendations, her thoughts about food and nutrition, and how she  
246 would feed her child if she lived in her native country. Across all four focus groups, most  
247 mothers shared similar beliefs on what they considered healthy and nutritious for themselves and  
248 their children. Some mothers believe fresh and healthy food is not easily accessible in the US  
249 due to cost and availability. In some focus groups, mothers stated that eating on the go was not  
250 good, and junk food is not good for their system (i.e., overall health). Other perceptions shared  
251 by participants included: school lunch and restaurant food are not very nutritious, fast food  
252 makes you heavy, candy will cause cavities, fruits help with constipation, large portion size will  
253 make you fat, children need to eat less sugar and more body-building food to grow and develop.  
254 As stated here:

255

256 *“...and now I’m actually starting to be conscious about okay this is one portion size. You*  
257 *can't be eating like five people's portion of rice for lunch, and then wonder why you're*  
258 *getting fat.” – R18*

259  
260 *“Yeah, my middle son, he expects snacks every day which is not good.” – R13*

261  
262 Although most mothers shared how difficult it was to eat healthy in the US, one mother had a  
263 different experience. She shared that it is possible and easy to stay healthy in the US. She said,

264  
265 *“...When you want to stay healthy here it's possible and it's very easy. Those things are*  
266 *already arranged in the aisle, they are already there for you to grab.” – R11*

267  
268 In three focus groups, when asked to share thoughts that came to mind when they heard  
269 about the US Department of Agriculture’s dietary recommendation guidelines, mothers shared  
270 positive and negative thoughts about various foods, what to eat and avoid, the disparities  
271 between countries, and the trustworthiness of government. As stated here,

272  
273 *“What comes to my mind is a chart that has been divided to determine proteins,*  
274 *carbohydrates, things you need to eat, [and] others you need to avoid yeah things like that” –*

275 R4

276  
277 *“Lot of lies” – R16*

278

279 “Lobbied” – R18

280

### 281 **3.4. Theme 4: Modeling**

282 “Modeling” encompasses the perception of whether the mother intentionally or  
283 unintentionally influences her child to eat healthy or unhealthy food. It includes what she eats in  
284 front of or away from her child, and what foods she avoids. In two focus groups, when asked  
285 what their children would list as the food they eat, they listed, African food (e.g., fufu, chicken,  
286 fish, afan soup, okra soup, leafy green vegetables, meat, rice), noodles, cake, and fruits. Some  
287 mothers avoided buying ‘super processed’ (e.g., Little Debbie cakes) food, packaged food,  
288 candy, cakes, cookies, sweets, and junk foods. As illustrated here,

289

290 *“I avoid eating certain foods, especially packaged foods. I eat a lot of fruit and drink tons*  
291 *of water. That's one thing my kids would say. I drink a lot of water.” – R19*

292

293 *“I really avoid buying of cakes, cookies, and sweets.” – R22*

294

295 One mother shared not avoiding anything. As stated here,

296

297 *“...I don't do that, whatever is good for me is good for him so sometimes he will tell me a*  
298 *mommy I want a pizza and when I get the pizza, I'll eat a slice myself.” – R7*

299

300 In every focus group, some mothers admitted to not eating certain foods (e.g., snacks,  
301 sweets, biscuits [also known as cookies], gum, unhealthy food) in front of their children because

302 they didn't want to share the item or wanted their children to have better eating habits. As this  
303 mother said,

304  
305 *“If I want to like eat my [any] snacks or something sweet, anytime I eat in front of them*  
306 *they end up eating it all. So, I just wait till they're not around and then I eat what I want*  
307 *to eat, but it doesn't influence what I buy for the house. I just regulate when I eat the*  
308 *snacks or whatever my guilty pleasures and then for dinner I just most times I'm eating*  
309 *something different or and I just give them a little. But they're getting used to the fact that*  
310 *I don't eat what everyone else is eating.” – R2*

311  
312 For one mother, she always ate healthy in front of her children. As stated below,

313  
314 *“I always eat healthy in front of my kids.” – R26*

315

### 316 **3.5. Theme 5: Acculturation**

317 Acculturation was the common theme, and it is comprised of four subthemes, *Adopting*  
318 *the US Lifestyle (opportunities and challenges), Nutrition Change, Child's Diet: Common Foods,*  
319 *and Child's Diet: School Lunch Food.*

320

#### 321 **3.5. 1 Subtheme 1: Adopting the US lifestyle (opportunities and challenges)**

322 This subtheme definition focuses on perceptions around adopting a US lifestyle, such  
323 that, since moving to the US, negative things mothers said about access to, eating and preparing  
324 food, and weight, changes in her diet, positive lifestyle changes, and how differently the child



325 would eat if he/she lived in the mother's native country. Overall, across all four focus groups,  
326 mothers made four main observations about food in the US, (1) there is an abundance of food  
327 (e.g., more snacks and larger portions ), less structured eating, and more fried foods; (2) the food  
328 quality, flavor, taste, and nutritional content are different compared to their native foods; (3) food  
329 is not as organic or as fresh in comparison to food in their native country; and (4) food is more  
330 expensive. For example, these mothers said,

331

332 *“Well, definitely is the whole lot more food in this country that isn't necessarily, you know*  
333 *as organic and fresh as back home. and, obviously, the more organic produce is more*  
334 *expensive here than back home and then definitely a lot more snacks are available here*  
335 *than back home, so I think my. well back home, I probably was eating more of the like*  
336 *heavy Nigerian food, you know, beans and rice and fufu and bigger servings” – R2*

337

338 *“In South Africa you can get varieties of food, homemade yes. But when you come to*  
339 *Atlanta and you have to buy a lot of stuff it's quite expensive, you know. Yeah, you may*  
340 *look for the same type of food, but you may not get it, so you have to take another option*  
341 *and it becomes expensive.” – R5*

342

343 On the other hand, some mothers have experienced positive lifestyle changes in their  
344 nutrition. Some have developed better eating habits, become more aware of alternatives to their  
345 native foods, learned about portion sizes, diversified their diet, and eat more salads and fruits.  
346 Although many mothers shared that the cost of organic produce in the US is prohibitive, one  
347 found eating organic food easy. As this mother put it,

348

349 *“Um so for me growing up just like most people from Nigeria said we would have three*  
350 *meals my mom made sure of that uh that has changed definitely since relocating for me I*  
351 *rarely eat breakfast I just don't get hungry now because I don't want to... Diet has*  
352 *changed. Growing up I don't remember eating salads. Now I'm a salad kind of girl so I*  
353 *would have like a salad around noon for lunch I definitely love Seafood not much of a*  
354 *meat eater, but I would eat fish all day if you let me and I didn't eat that growing up like*  
355 *we always had like beef and stuff like that chicken. And now I'm not really much of a beef*  
356 *or chicken kind of girl, but I'll take fish any day. I love fruit so I would eat fruit I try to*  
357 *snack on healthy stuff even though I have three kids.” – R30*

358

359 In participants' native countries, food was varied, natural, and homegrown, most meals  
360 were homecooked, some mothers shared eating heavier meals (e.g., big meal for lunch, smaller  
361 meal for dinner), on a structured eating schedule (e.g., cooked and ate 3 meals per day), and at  
362 the table. Also, some shared that chips or candy were absent in the home, eating out was on  
363 occasion, and snacking was limited. As stated here,

364

365 *“...When I just got here [the US] was different because I was home [native country] all*  
366 *the time, so it was kind of structured back then. I woke up in the morning, I'll get my*  
367 *normal breakfast, eat my lunch, eat my dinner, three straight meals a day. But then when*  
368 *I got into the system when I started getting busy it got so different.” – R7*

369

370 *"...All right, so literally my diet hasn't changed too as well. I still eat most of my African*  
371 *food and which I also allow my kids to eat too except that I have had this opportunity to*  
372 *have variety of fruits here in America. So that has really, I incorporated that into my diet.*  
373 *I eat variety of fruits now which we don't really too much have access to in Africa."* –

374 R26

375

376 Mothers did not hesitate to share the differences in their children if they lived in their  
377 native country. For example, their dietary habits would include fewer snacks, less juice, no  
378 cereal, and rich in natural foods and not canned or processed foods. As stated here,  
379 “So, they definitely would not be having as many snacks as they do now, like you know in  
380 school, they give them morning snack, afternoon snack and then, when we pick them up from  
381 school, we also give them a snack so they probably will not be eating as many snacks.” – R2

382

383 *“If she was born back home, I would feed her with traditional porridge from millet*  
384 *compared to now...again snacks would not be their favorite meals”* – R1

385

386 *“If she was born in my native country, I would feed her with Kenyan foods all through. I*  
387 *don't think I would introduce snacks.”* – R6

388

389 *“So, I I think that they would there would be a lot less juice they would not consume*  
390 *cereal at all which they do now because it's not as easily accessible back home and it's*  
391 *very expensive...”* – R19

392 **3.5. 2 Subtheme 2: Nutrition Change**

393 This subtheme is defined as the reasons for change in diet in the US (accessibility, cost,  
394 availability, schedule). In two of the four focus groups, work schedule, cost of foods, access to  
395 fruits, access to native foods, cost of organic food, and lack of a support system are some of the  
396 reasons mothers gave for the change in their dietary habits in the US. The pace of life in the US  
397 is very different compared to that of their native country; it is much faster and more stressful. In  
398 their native country, they had help from family members, so they didn't feel the stress of raising  
399 a family. These are some of the factors responsible for the change in their new lifestyle such as  
400 the number of meals which has decreased from three square meals a day to two and one for  
401 others, skipping breakfast, cooking less, and cooking weekly instead of daily. As these mothers  
402 said,

403  
404 *"So, the eating habit back home was very wonderful I wish I could adopt that here. and*  
405 *then I don't know but I'm trying. Some days it works, some days it doesn't. I know here*  
406 *everything is junk junk junk. Here, the organic is very expensive so we can't even afford it*  
407 *so we have to go with whatever we can afford yeah."* – R7

408  
409 *"... And um I've really been drained by the system um eating much of um chips and*  
410 *chicken and cereals and the rest yeah that's my experience."* – R10

411

### 412 **3.5. 3 Subtheme 3: Child's Diet: Common Foods**

413 This subtheme focuses on reports of what the child eats for breakfast, lunch, dinner, and  
414 snacks in the US. Across all focus groups, most children's diets consisted of a mixture of African  
415 foods and American foods. For breakfast children eat a wide variety of foods, including oatmeal

416 with fruits, eggs, sausage, bacon, bread and tuna, tea, or peanut butter, meat pie, pastries,  
417 samosas, pasta and chicken, and chicken nuggets. During lunch at home, they also ate a mixed  
418 diet. Children ate mashed potatoes, mac and cheese, chicken nuggets, pasta, salmon, steak,  
419 veggies, ugali, and plantains. The dinner menu was similar to the lunch menu. As for drinks,  
420 water was the most common. Children also ate a variety of fruits such as oranges, apples,  
421 mangoes, and strawberries. Snacks were very popular in most children's diets, and they varied  
422 widely. Children ate fruits, chocolates, cookies, vegetables, yogurt, chips, and popcorn. For  
423 example, three mothers said,

424  
425 *“My kids, they love to eat fufu and okra soup a lot yeah, they love to eat that a lot. They*  
426 *like to eat jollof rice too, vegetables, fish you know stuff like that, mostly like Nigerian*  
427 *meals. They eat other pizzas stuff like that but those are an occasional basis. They like to*  
428 *eat um yam and sauce with vegetables most of their food comes with vegetables spinach*  
429 *or kale you know and some other Nigerian vegetables, like we call it ugwu. It is pumpkin*  
430 *leaves, yeah. So, most times I try to put vegetables in all their food. The okra soup is*  
431 *made with a lot of vegetables too.” – R14*

432  
433 *“In the mornings, they eat either bread and peanut butter and some water and a fruit or*  
434 *they eat oatmeal or cheerios and almond milk with the go go's squeeze, those green apple*  
435 *sauce juice packs.” – R2*

436  
437 *“...and yes, for breakfast mostly it's usually the egg omelets and sausages and milk.” –*  
438 R21

439

440 In all four focus groups, while most families ate African foods regularly, for a couple of  
441 mothers, their native foods were not as frequent, once a week or when visiting grandparents. As  
442 stated here,

443

444 *“I think for my household, we are actually different. I don't do a lot of our traditional*  
445 *food, not as often so my son, he knows it and now I still eat it like if we go to my parents*  
446 *and stuff. But I don't; cook it at home often. I cook lots of the American style food. So, it's*  
447 *completely different to what I grew up from what he's eating now.” – R3*

448

449 Eating out was not a common practice in many households. Among mothers who talked  
450 about eating out, they did so once or twice a week and usually on the weekend. Another food  
451 type parents deferred to the weekend was desserts. As this mother put it,

452

453 *“You know we eat the same thing African food yeah and restaurant once in a blue moon.*  
454 *I don't like eating out so I'm so picky, I mean everything is homemade. Most of it. once in*  
455 *a blue moon is if you have to eat in the restaurant, it got to be seafood like... Yeah, I*  
456 *really watch their diet.” – R8*

457

#### 458 **3.5. 4 Subtheme 4: Child's Diet: School Lunch food**

459 This is defined as whether the child eats school lunch or takes a packed lunch, the reasons  
460 the mother gives for the child eating school lunch or packed lunch, the mother's  
461 feelings/thoughts/opinions about school lunch, and where the mother thinks the child eats better,

462 at school or home. When it came to school lunch, children ate the school lunch or a packed  
463 lunch. Overall, across all four focus groups, mothers did not know how well their children ate at  
464 school. In three focus groups, mothers felt that their children ate better (i.e., the nutrition of the  
465 food) at home than at school, but one mother felt that her child ate better at school because of the  
466 discipline and structure. Mothers who packed lunch did so for various reasons, such as the school  
467 lunch did not match their standards at home, it was not as nutritious, it cost too much (e.g., \$10),  
468 no school lunch was offered, the food was unfamiliar to the child, and the child was not going to  
469 eat what was on the menu for the day. Usually, mothers packed food that the child would  
470 normally eat at home or sandwiches. For example, two mothers said,

471  
472 *“The best is to pack her lunch, because I don’t really know what the school will feed her*  
473 *with, like I don’t trust the feeding in school to be the same with my feeding standards at*  
474 *home.” – R9*

475  
476 *“Yeah, my son is at school. I take him to daycare. So, I think that he eats better at school*  
477 *than at home because there are disciplines not like at home, where I have to force him to*  
478 *eat.” – R1*

479  
480 There was some positive feedback on school lunch. A few mothers believed that the  
481 quality of the school lunch had improved in recent years and acknowledged how hard it can be to  
482 try to cook and feed school children. Because of school lunch, some children started eating more  
483 vegetables. One mother shared that her daughter started asking for spinach at home after being

484 introduced to it at school. For another, her children only take fruits as snacks to school because  
485 they are pushing for less processed food. As this mother said,

486  
487 *“Never prior to starting school he would not eat broccoli but now he eats broccoli because*  
488 *he was eating it at school ...so because of that but I think it's introduced them to veggies. I*  
489 *think they've done better my oldest would eat broccoli now and he never ate it as a kid for me*  
490 *before he started school.” – R30*

491

### 492 **3.6. Theme 6: Coercive Control**

493 This theme is defined as what and how mothers restrict unhealthy food and encourage  
494 healthy food consumption in their children. Multiple mothers gave examples of how they limit  
495 access and opportunity to unhealthy foods (e.g., processed food, junk food). For some, they  
496 eliminate sugar, limit consumption of certain ingredients, or swap out unhealthy foods for  
497 healthier ones. As stated below,

498 *“Because I have issues with eating sugar, so I try to not give her anything sugar. I*  
499 *try to reduce like um foods that have a lot of nitrates like you know the um like the*  
500 *sandwich meat and hot dogs and things like that um. I don't give her those things*  
501 *even though she likes them, and she asks for them but I yeah, I don't give it to her”*

502 – R27

503

504 *“I am not big on junk foods. So, I try to replace it with fruits, but let them have it every*  
505 *once in a while.” – R14*

506



507 Pressure to eat came up when mothers were asked “*if they ever try to get their child to*  
508 *eat.*” This practice was used to insist that the child eat real food and at times mothers used bribes  
509 in the negotiating process. As stated below,

510  
511 “*Um so my daughter doesn't she doesn't really like to eat like. We have to force her to eat*  
512 *like a real food. She's more of a snack and candy person, and so the way we get her to*  
513 *eat, like her vegetables and things is we say, ‘well, you need to make sure you finish your*  
514 *food, and if you finish your food, you get a treat like ice cream or not every day, [but you*  
515 *know], or you get a lollipop or if you finish this; over the weekend I’ll take you out to go*  
516 *get something sweet’ that we know she likes. So that's kind of how we use food.” – R2*

517

### 518 **3.7. Theme 7: Structure**

519 This is about a system mothers put in place to influence the child to eat in certain way,  
520 such as rules and limits. In addition to placing limits, some study participants also monitor what  
521 the child eats. They keep track or directly ask the child; for example, ‘what did you eat at  
522 school’? As stated below,

523 “*Yeah, for my kids. I have to regulate the junk like things like soda, things like biscuits,*  
524 *things like lollipop. Yeah, you know these foods are sugary, so they cause lack of appetite*  
525 *to the kid. So, when you give all things like soda, things like ice cream you find that at the*  
526 *end of the day the child is not able to take things like Ugali or the real food now. This*  
527 *will cause an effect to the health of the kid. Thank you. So, I have to regulate the junk.” –*

528 R1

529

530 And they also shared rules they employ to minimize the consumption of desserts, sweets,  
531 junk foods, etc. Some mothers use a point system to earn certain foods (e.g., candy, juice), some  
532 set a limit on how many snacks the child can have a day, and some leave junk and sweets for the  
533 weekend. As stated below,

534

535 *“So, what I do to regulate that I tell them one sweet a day so it's either um if you get a*  
536 *juice no ice cream um if you got candy at school, you can't come home and get a juice*  
537 *and if they give you candy at school ...then the juice box it's not like you get it you have*  
538 *to earn it. Like I'm on a point system. If you do what is right the whole week maybe, you*  
539 *can take a juice box with your meal um so if you don't have points don't come and ask me*  
540 *for a juice box so that also helped.” – R28*

541

542 *“For mine I actually have a snack he has his own snack bucket, and he gets to go choose*  
543 *the snack. So, he knows that he gets 2 snacks, and he gets to choose whatever 2 snacks*  
544 *that he wants. So, I try to regulate it by teaching him how do to. You get 2 snacks and*  
545 *then after that that's it on what you pick and then, in the afternoon time we don't do juice*  
546 *and stuff.” – R3*

547

548 *“We have a rule, example, soda - do not touch; juice every Wednesday.” – R17*

549

## 550 Discussion

### 551 4.1. Summary of main findings

552           The current study was designed to fill an existing gap in the literature about the food  
553 parenting practices of Black immigrant mothers in the US while guided by the SCT. Specifically,  
554 the main objective was to assess maternal knowledge, attitudes, beliefs, acculturation, and  
555 modeling in relation to food parenting practices. The four focus groups revealed seven major  
556 themes and six subthemes. In short, most Black immigrant mothers in this sample shared similar  
557 knowledge, attitudes, and beliefs on nutrition. In fact, they are intentional about encouraging the  
558 intake of healthy foods (e.g., fruits, vegetables, water, minimally processed foods) and limiting  
559 the consumption of unhealthy foods (e.g., candy, junk food, sugar sweetened beverages).  
560 Additionally, mothers' childhood dietary habits and native culture influence what they do or do  
561 not feed their children. Above all acculturation played a key role in their food parenting practices  
562 in positive and negative ways.

563           **Knowledge and Beliefs.** Overall, Black immigrant mothers in this sample shared  
564 congruent knowledge, attitudes, and beliefs on nutrition, which in turn was found to directly  
565 influence their food parenting practices. This finding agrees with [21] results, nutritional belief  
566 was significantly associated with feeding style. Also, mothers confidently shared which foods the  
567 child should eat and why. This finding corroborates what Cook [22] found, that Black  
568 immigrant mothers in the UK were knowledgeable of what constitutes a healthy diet: lots of  
569 fruits and vegetables, whole, natural, and fresh foods. Participants were also educated on,  
570 capable of, and confident in preparing healthy meals for their children. Additionally, mothers in  
571 this study frequently reported rules about snacking, (i.e., the number, the type, and the timing of  
572 snacks). Also, they intentionally kept some foods out of their child's reach, and ensured the child  
573 did not eat too many sweets or their favorite unhealthy foods.

574 On the other hand, participants also shared what additional information they would like to  
575 receive on nutrition, notably foods that can boost appetite in a child that does not like to eat  
576 minimally processed food, foods that help the child to grow and remain healthy, and how much  
577 to consume from each food group. Most mothers were clear on what foods they considered  
578 healthy and unhealthy. A prevailing belief among mothers was that fresh food is not easily  
579 accessible in the US, and it is expensive. Many perceived their native foods to be healthier and  
580 less processed. These results match those observed in an earlier study by Jakub [23] and a  
581 scoping review [24], where some Black African immigrants considered their native foods,  
582 including those with high-fat content, healthier compared to American foods because African  
583 cuisine is primarily minimally processed, unlike American cuisine.

584 Although mothers displayed confidence in their knowledge and beliefs on healthy and  
585 nutritious foods for their children, they also wanted to obtain more information on this topic. In  
586 sum, there are three main points. Mothers seem to be doing the best they know how at this point  
587 and with the information they have. Second, they are concerned whether the offered food is  
588 indeed the best for their child. Finally, mothers want more information to confirm that what they  
589 are doing is indeed the best approach for feeding the child. As previously mentioned, SCT has  
590 been used to help explain human health behavior. Focus group discussions confirmed the  
591 relationship between the personal and behavioral factors in this group of Black immigrant  
592 mothers. Specifically, a mother's nutritional knowledge (personal factors) directly influences her  
593 food parenting practices (behavioral factors) and her child's dietary habits.

594 **Attitudes.** Parent's childhood experiences influence how they feed their children [25]. A  
595 mother's perception about food influences how she feeds her children, and these perceptions  
596 have been influenced by how her parents fed her as a child. In this investigation, Black

597 immigrant mothers reported being more likely to prepare homecooked meals if their mothers did  
598 so and also to give their children foods they ate and/or enjoyed as children. Additionally, for  
599 many mothers, snacking is not a part of their native culture, and they want to limit the amount  
600 and type of snacks their children eat.

601         **Modeling.** Modeling was another theme that emerged during focus group data analysis.  
602 When asked “*If your child was asked to list the foods you normally eat, what foods would they*  
603 *list?*” mothers listed African foods, American foods, foods from other nationalities, sweets, and  
604 fruits. They also shared which foods they avoid or eat away from their children, such as  
605 processed, packaged, and junk foods. These findings are similar to those from previous studies in  
606 immigrant populations who valued fresh, natural, minimally processed, and native foods, and  
607 homecooked meals over canned, processed, and fast foods [24, 26, 27]. Many mothers reported  
608 being conscious of eating more healthily in front of their children. Interestingly, mothers made a  
609 distinction between the foods they eat in front and away from their children. Perhaps, children  
610 are aware of all the types of foods their mothers eat, and their dietary behavior is influenced  
611 beyond the modeling mothers strive to parent overtly.

612         Participants’ comments on attitudes and modeling match findings from a systematic  
613 review [28] that revealed that adolescents’ belief in healthy eating increased when they saw  
614 family members eating healthy food. Youths were more motivated to make healthy or unhealthy  
615 choices by observing parents or siblings’ food choices. Birch [29] also reported that children’s  
616 dietary behavior is influenced by observing that of their parents. In short, a mother’s eating style  
617 can explain her child’s eating style [30].

618         **Acculturation.** A major theme across all focus group interviews was acculturation. This  
619 is unsurprising, because studies on immigrant population have previously reported on the key

620 role acculturation plays on eating, nutrition, and weight in both positive and negative ways [5,  
621 17, 31, 32]. The mother's reported knowledge and attitudes, the foods she eats, feeds her  
622 children, and the why, were all heavily influenced by the culture of her native country. Most  
623 participants shared that eating healthy is important. Mothers believe that fresh food is not easily  
624 accessible in the US, eating healthy in the US is difficult, and think that certain foods should be  
625 avoided. They also shared that the quality, flavor, taste, and nutritional content of food in the US  
626 is not the same, unsatisfactory, compared to the food in their native country. Also, food costs  
627 more, and eating organic is not as feasible. Consequently, their eating has changed since  
628 migrating to the US. A possible solution to overcome food costs, is to purchase healthy food on  
629 sale, eat foods based on their harvest season (e.g., fall foods in the fall, winter foods in the  
630 winter), plan the food menu for the week in advance, shop at different grocery stores, and utilize  
631 online resources to learn how to save money on purchasing nutritious foods.

632 For some mothers, their eating has improved since migration in the following ways:  
633 becoming aware of portion sizes and eating more fruits and salads. As mentioned earlier, their  
634 diets now have some American elements, such as snacking, international cuisines, and eating  
635 out. These findings further support the idea of bi-dimensional acculturation, where Black  
636 immigrant mothers maintain parts of their native culture and adopt parts of the American culture,  
637 experienced by African immigrants women in high-income countries who consumed both their  
638 native foods and non-native foods, but preferred their native foods, added salt and other spices to  
639 the local food to make it tastier [32].

640 There are multiple reasons for the change in the diet of Black immigrant mothers since  
641 migrating to the US, the cost of food, availability of native foods, excess availability of fast  
642 foods, schedules, no to minimal support system, and stress levels. These findings support

643 previous research who reported that African immigrant women adopted American dietary habits  
644 more easily because of busier schedules, less time to cook their native foods, and easy access to  
645 unhealthy foods [27, 32]. Alsubhi [5] and Berggreen-Clausen [24] also found that because of  
646 work schedules, immigrant mothers had less time to cook for their children, and the cost of  
647 healthy food was a barrier to eating healthy.

648 The children of the women in this study were noted by their mothers to eat a mixed diet  
649 of African and American foods. In some homes, the diet is primarily African, in others it is  
650 largely American. This finding matches a study [33] where the diet of African immigrant  
651 children in the US was significantly influenced by their parents' native culture. Overall, their diet  
652 consists of whole foods, homemade foods, fruits, processed foods, and snacks. This is consistent  
653 with another study [27] of Black immigrant children who reported eating a mixed diet, and  
654 positive diet (i.e., fruits, vegetables, milk) changes since migrating to Canada. A popular drink  
655 among children is water, which is the preferred beverage according to the United States  
656 Department of Agriculture dietary guidelines [34].

657 Furthermore, for children enrolled in school, mothers reported that they either eat at  
658 school or bring a packed lunch. Mothers are uncertain what the child eats at school, or how much  
659 they eat. Many mothers say their children eat more nutritious and better-quality food at home  
660 compared to school. Moreover, some reported the positive influence school lunch had on their  
661 children, such as eating more vegetables.

662 The results of this study support the utility of the SCT model in food parenting practices  
663 research. In particular, a mother's personal factors (knowledge, attitudes, and beliefs) have a  
664 reciprocal relationship with her environment (acculturation) and directly influences her behavior  
665 (food parenting practices). More research is needed to explore the relationship between mothers'

666 specific food parenting practices, the child’s dietary behavior and weight. Further research might  
667 investigate what other elements in a mother’s environment influence specific food parenting  
668 practices such as social determinants of health, and child’s age and sex.

669

## 670 **4.2. Strengths and limitations**

671 To the best of the researcher’s knowledge, this was the first qualitative study on maternal  
672 knowledge, attitudes, beliefs, acculturation, and modeling in relation to food parenting practices  
673 that was conducted with Black immigrant mothers in the US. Therefore, these findings have  
674 major implications for Black immigrants living in the US and other developed countries in the  
675 West. This study provides vital and useful information when working with Black immigrants,  
676 similar to this sample, on nutrition and obesity prevention. This information can be used in the  
677 dissemination and implementation of health knowledge that is culturally relevant to Black  
678 immigrants. Another strength of this study is the 83% inter-rater reliability in data coding which  
679 reduced qualitative study bias. The findings in this report are subject to a couple limitations.  
680 First, the data were collected in one metro city in the US. Therefore, the findings cannot be  
681 generalized to all Black immigrant mothers in the US, but may be transferrable to those who live  
682 in similar metropolitan areas in the US. Second, social desirability bias, is a common limitation  
683 found in focus group data [35] . We minimized this risk by establishing ground rules at the  
684 beginning of each focus group. Nevertheless, this research extends our knowledge on how Black  
685 immigrant mothers in the US feed their children and the many factors that influence those  
686 decisions.

687



## 688 Conclusion

689 In sum, this qualitative study provides important information on the unique perspective  
690 and challenges of food parenting practices of Black immigrant mothers in the US. To the  
691 authors' knowledge, this is the first study in the US to explore the food parenting practices of  
692 Black immigrant mothers while informed by the SCT. The focus group discussions revealed this  
693 study population has a unique challenge in feeding their children in the US. Their personal  
694 factors (i.e., knowledge, attitude, belief) and environmental factors (i.e., acculturation) directly  
695 influence their behavioral factors (i.e., food parenting practices) which in turn impact their  
696 children's dietary behavior. The child's dietary behavior, food choice, and eating behavior can be  
697 predictive of adiposity and the attendant morbidity that accompanies excess body weight [36,  
698 37]. This study highlights essential areas to consider when developing nutritional or obesity  
699 interventions for this population.

700

## 701 Acknowledgments

702 Shahin Zare, MPH and Saudi Mamudu, MPH assisted in the focus group data collection.

703

704

## 705 References

706

- 707 [1] U.S. Department of Health and Human Services, Health Resources and Services  
708 Administration (HRSA), Maternal and Child Health Bureau (MCHB). 2019-2020  
709 National Survey of Children's Health (NSCH) data query. *Child and Adolescent Health  
710 Measurement Initiative*, <http://www.childhealthdata.org> (accessed March 21, 2022).

- 711 [2] Baker EH, Rendall MS, Weden MM. Epidemiological paradox or immigrant  
712 vulnerability? obesity among young children of immigrants. *Demography* 2015; 52:  
713 1295–1320.
- 714 [3] Vaughn AE, Ward DS, Fisher JO, et al. Fundamental constructs in food parenting  
715 practices: a content map to guide future research. *Nutr Rev* 2016; 74: 98–117.
- 716 [4] Blissett J, Bennett C. Cultural differences in parental feeding practices and children’s  
717 eating behaviours and their relationships with child BMI: a comparison of Black Afro-  
718 Caribbean, White British and White German samples. *Eur J Clin Nutr* 2013; 67: 180–  
719 184.
- 720 [5] Alsubhi M, Goldthorpe J, Epton T, et al. What factors are associated with obesity-related  
721 health behaviours among child refugees following resettlement in developed countries? A  
722 systematic review and synthesis of qualitative and quantitative evidence. *Obes Rev* 2020;  
723 21: e13058.
- 724 [6] Who J, Consultation FE. Diet, nutrition and the prevention of chronic diseases. *World*  
725 *Health Organ Tech Rep Ser* 2003; 916: 1–149.
- 726 [7] U.N.I.C.E.F. Early Childhood Nutrition.
- 727 [8] Centers for Disease Prevention and Health Promotion. National Center for Chronic  
728 Disease Prevention and Health Promotion (NCCDPHP). *Poor Nutrition*,  
729 <https://www.cdc.gov/chronicdisease/resources/publications/factsheets/nutrition.htm>  
730 (accessed November 12, 2020).
- 731 [9] Ojo O. Nutrition and chronic conditions. *Nutrients*; 11. Epub ahead of print February 22,  
732 2019. DOI: 10.3390/nu11020459.
- 733 [10] Chiuve SE, Sampson L, Willett WC. The association between a nutritional quality index  
734 and risk of chronic disease. *Am J Prev Med* 2011; 40: 505–513.
- 735 [11] USDA Food and Nutrition Service. Healthy Eating Index (HEI) | Food and Nutrition  
736 Service. *Healthy Eating Index (HEI)*, [https://www.fns.usda.gov/cnpp/healthy-eating-](https://www.fns.usda.gov/cnpp/healthy-eating-index-hei)  
737 [index-hei](https://www.fns.usda.gov/cnpp/healthy-eating-index-hei) (2023, accessed December 14, 2023).
- 738 [12] Mahmood L, Flores-Barrantes P, Moreno LA, et al. The influence of parental dietary  
739 behaviors and practices on children’s eating habits. *Nutrients*; 13. Epub ahead of print  
740 March 30, 2021. DOI: 10.3390/nu13041138.
- 741 [13] Hughes SO, Power TG, O’Connor TM, et al. Maternal Feeding Styles and Food  
742 Parenting Practices as Predictors of Longitudinal Changes in Weight Status in Hispanic  
743 Preschoolers from Low-Income Families. *J Obes* 2016; 2016: 7201082.

- 744 [14] Hill JO, Peters JC. Environmental contributions to the obesity epidemic. *Science* 1998;  
745 280: 1371–1374.
- 746 [15] Bandura A. Health Promotion from the Perspective of Social Cognitive Theory.
- 747 [16] Bandura A. Social cognitive theory of self-regulation. *Organ Behav Hum Decis Process*  
748 1991; 50: 248–287.
- 749 [17] Delavari M, Sønderlund AL, Swinburn B, et al. Acculturation and obesity among  
750 migrant populations in high income countries--a systematic review. *BMC Public Health*  
751 2013; 13: 458.
- 752 [18] Commodore-Mensah Y, Ukonu N, Obisesan O, et al. Length of residence in the united  
753 states is associated with a higher prevalence of cardiometabolic risk factors in  
754 immigrants: A contemporary analysis of the national health interview survey. *J Am Heart*  
755 *Assoc*; 5. Epub ahead of print November 4, 2016. DOI: 10.1161/JAHA.116.004059.
- 756 [19] Kengneson C-C, Blanchet R, Sanou D, et al. Factors associated with feeding practices of  
757 black immigrant mothers of African and Caribbean origin living in Ottawa, Canada.  
758 *Appetite* 2021; 167: 105641.
- 759 [20] Braun V, Clarke V. Using thematic analysis in psychology. *Qual Res Psychol* 2006; 3:  
760 77–101.
- 761 [21] Boucher NL. Feeding style and a child’s body mass index. *J Pediatr Health Care* 2016;  
762 30: 583–589.
- 763 [22] Cook EJ, Powell FC, Ali N, et al. “They Are Kids, Let Them Eat”: A Qualitative  
764 Investigation into the Parental Beliefs and Practices of Providing a Healthy Diet for  
765 Young Children among a Culturally Diverse and Deprived Population in the UK. *Int J*  
766 *Environ Res Public Health*; 18. Epub ahead of print December 11, 2021. DOI:  
767 10.3390/ijerph182413087.
- 768 [23] Jakub KE, Turk MT, Fapohunda A, et al. Cultural beliefs, perceptions, and practices of  
769 young adult offspring of african immigrants regarding healthy eating and activity. *J*  
770 *Transcult Nurs* 2018; 29: 548–554.
- 771 [24] Berggreen-Clausen A, Hseing Pha S, Mølsted Alvesson H, et al. Food environment  
772 interactions after migration: a scoping review on low- and middle-income country  
773 immigrants in high-income countries. *Public Health Nutr* 2022; 25: 136–158.
- 774 [25] Mena NZ, Gorman K, Dickin K, et al. Contextual and Cultural Influences on Parental  
775 Feeding Practices and Involvement in Child Care Centers among Hispanic Parents. *Child*  
776 *Obes* 2015; 11: 347–354.

- 777 [26] Cook EJ, Powell FC, Ali N, et al. Parents' experiences of complementary feeding among  
778 a United Kingdom culturally diverse and deprived community. *Matern Child Nutr* 2021;  
779 17: e13108.
- 780 [27] Blanchet R, Sanou D, Batal M, et al. Draw and tell: dietary acculturation as lived by  
781 black immigrant children of african and caribbean descent residing in canada. *J Nutr*  
782 *Educ Behav* 2017; 49: 838-846.e1.
- 783 [28] Liu KSN, Chen JY, Ng MYC, et al. How does the family influence adolescent eating  
784 habits in terms of knowledge, attitudes and practices? A global systematic review of  
785 qualitative studies. *Nutrients*; 13. Epub ahead of print October 22, 2021. DOI:  
786 10.3390/nu13113717.
- 787 [29] Birch LL, Fisher JO. Development of eating behaviors among children and adolescents.  
788 *Pediatrics* 1998; 101: 539-549.
- 789 [30] Mallan K, Miller N. Effect of parental feeding practices (i.e., responsive feeding) on  
790 children's eating behavior. *Nestle Nutr Inst Workshop Ser* 2019; 91: 21-30.
- 791 [31] Zhang Q, Liu R, Diggs LA, et al. Does acculturation affect the dietary intakes and body  
792 weight status of children of immigrants in the U.S. and other developed countries? A  
793 systematic review. *Ethn Health* 2019; 24: 73-93.
- 794 [32] Ngongalah L, Rankin J, Rapley T, et al. Dietary and physical activity behaviours in  
795 african migrant women living in high income countries: A systematic review and  
796 framework synthesis. *Nutrients*; 10. Epub ahead of print August 3, 2018. DOI:  
797 10.3390/nu10081017.
- 798 [33] Salami B, Fernandez-Sanchez H, Fouche C, et al. A scoping review of the health of  
799 african immigrant and refugee children. *Int J Environ Res Public Health*; 18. Epub ahead  
800 of print March 28, 2021. DOI: 10.3390/ijerph18073514.
- 801 [34] USHHS U. *Dietary Guidelines for Americans, 2020-2025*. 9th edition,  
802 <http://DietaryGuidelines.gov>, December 2020.
- 803 [35] Bergen N, Labonté R. "everything is perfect, and we have no problems": detecting and  
804 limiting social desirability bias in qualitative research. *Qual Health Res* 2020; 30: 783-  
805 792.
- 806 [36] Horesh A, Tsur AM, Bardugo A, et al. Adolescent and Childhood Obesity and Excess  
807 Morbidity and Mortality in Young Adulthood-a Systematic Review. *Curr Obes Rep*  
808 2021; 10: 301-310.
- 809 [37] Sohi DK, Van Hulst A, McNealis V, et al. Early Lifestyle Determinants of Adiposity  
810 Trajectories from Childhood into Late Adolescence. *Child Obes*. Epub ahead of print  
811 December 13, 2023. DOI: 10.1089/chi.2023.0062.

Application of the Social Cognitive Theory amid food parenting practices of Black immigrant mothers in the US: A qualitative study

Phoebe Tchoua<sup>1\*</sup>,<sup>#a</sup>, Mary Brannock<sup>1</sup>, Deborah Slawson<sup>1</sup>,

**Fig 1. Social Cognitive Theory Model.**

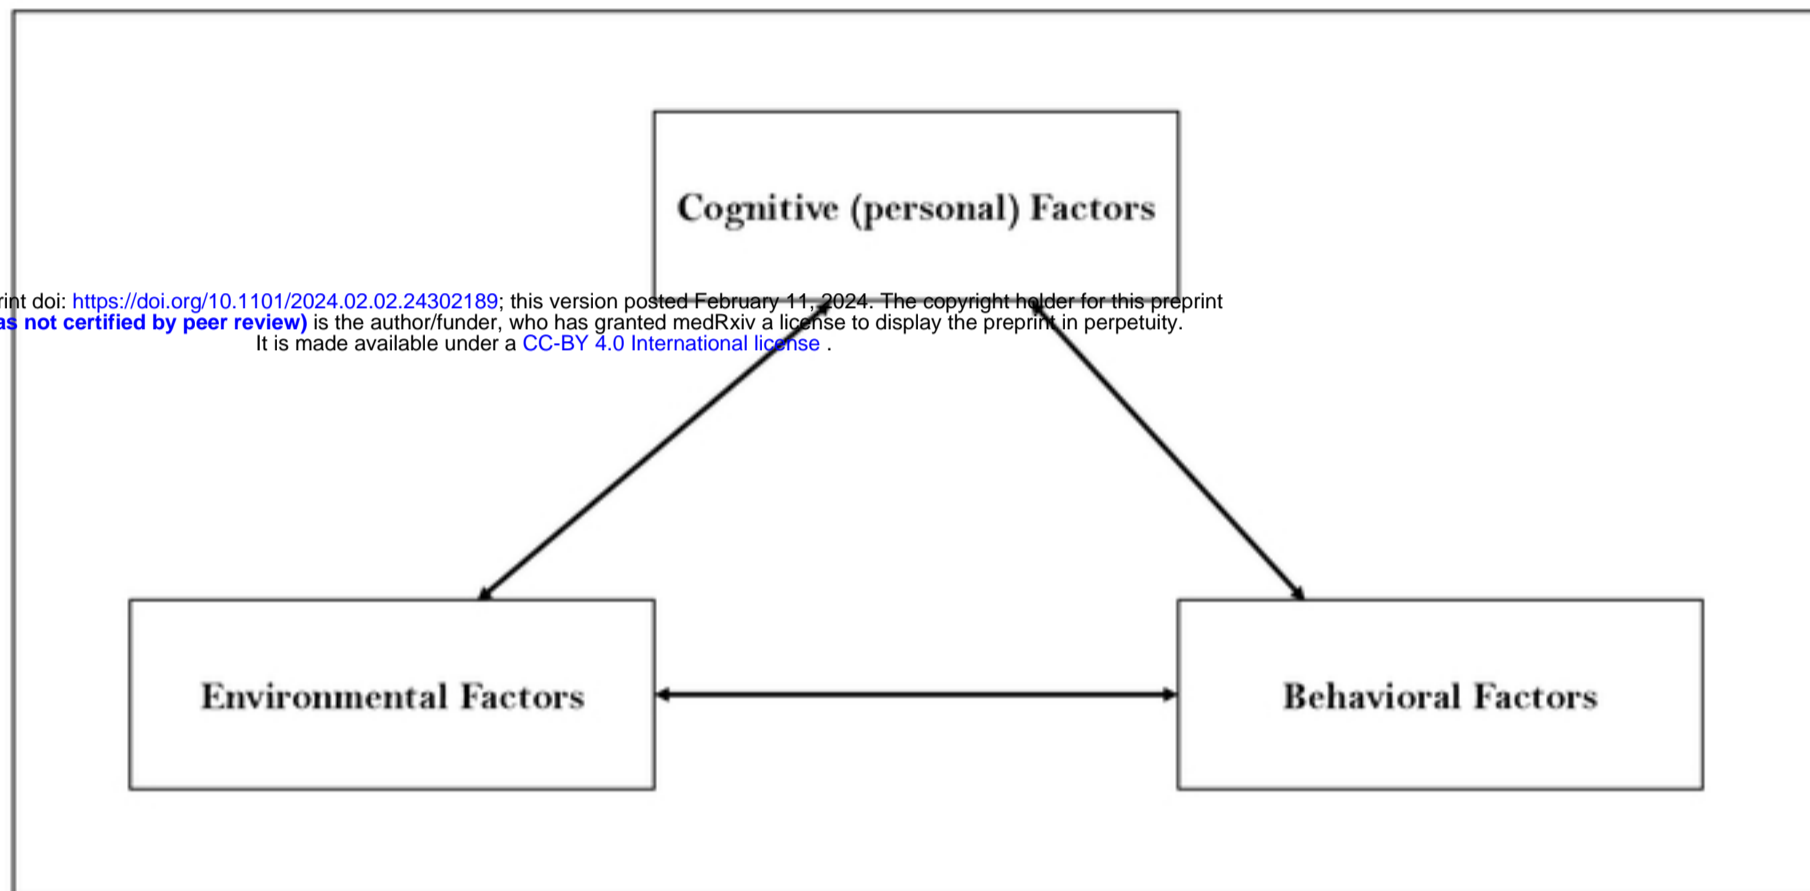

medRxiv preprint doi: <https://doi.org/10.1101/2024.02.02.24302189>; this version posted February 11, 2024. The copyright holder for this preprint (which was not certified by peer review) is the author/funder, who has granted medRxiv a license to display the preprint in perpetuity. It is made available under a [CC-BY 4.0 International license](https://creativecommons.org/licenses/by/4.0/).

**Fig 2. Modified Social Cognitive Theory Model.**

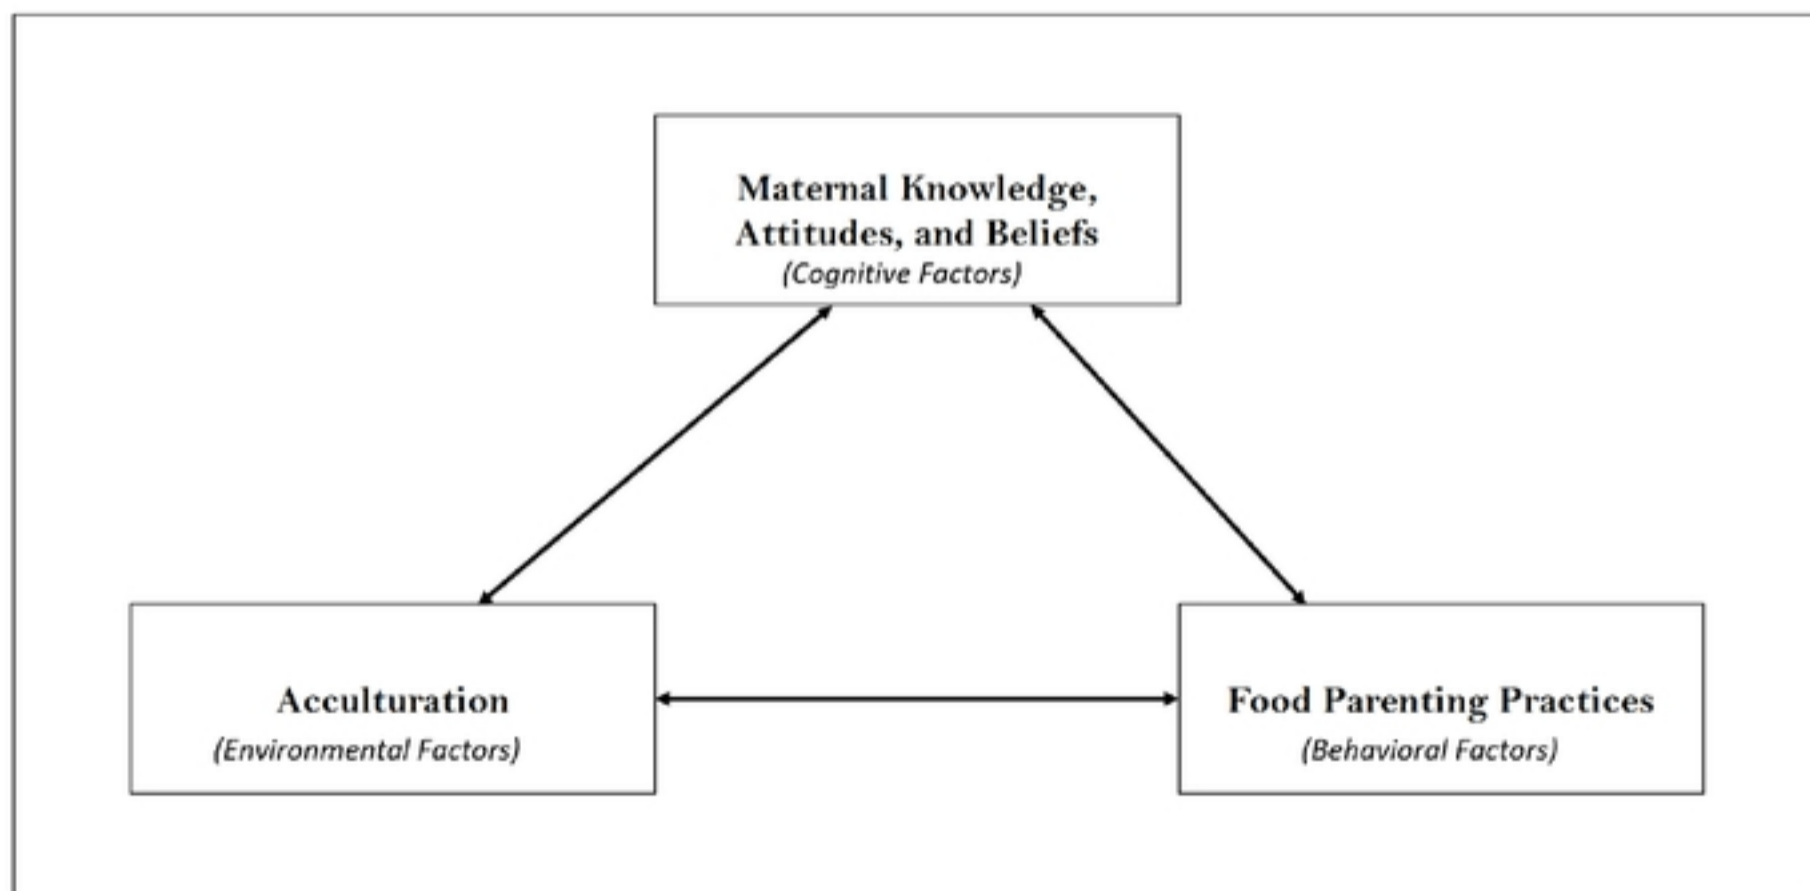

Source: https://medrxiv.org/content/10.1101/2024.02.02.24302189v1.full.pdf
